# Supplementary material for: Comparative transcriptome analysis of Eimeria maxima (Apicomplexa: Eimeriidae) suggests DNA replication activities correlating with its fecundity
Source: PubMed Central journal article supplement (PMC6154952; doi:10.1186/s12864-018-5090-2), 2018-09-24

**BJ-WT-130****BJ-PL-98**

32h

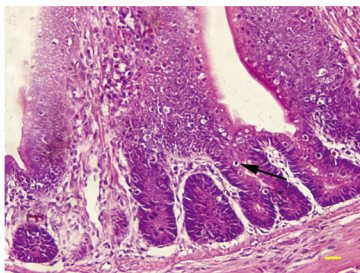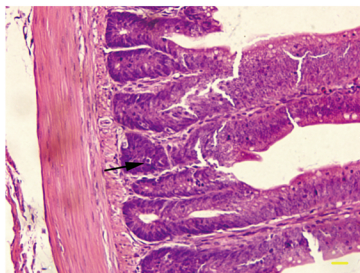

64h

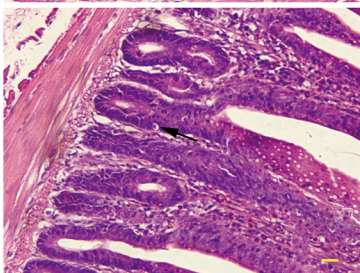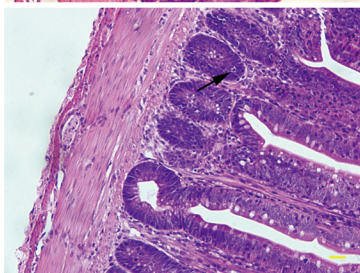

80h

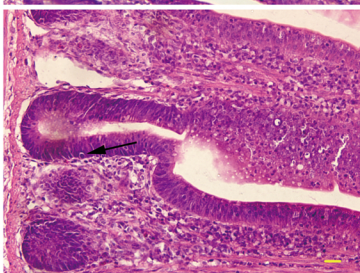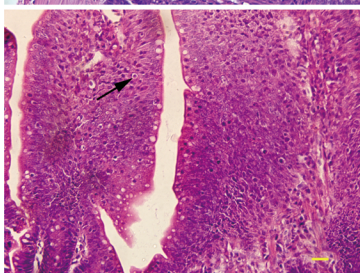

88h

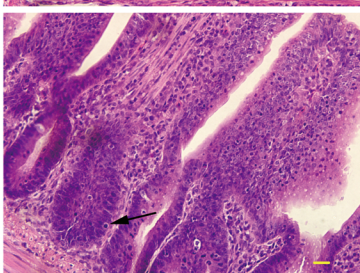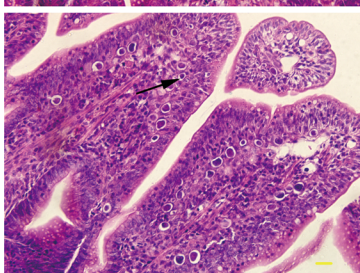

96h

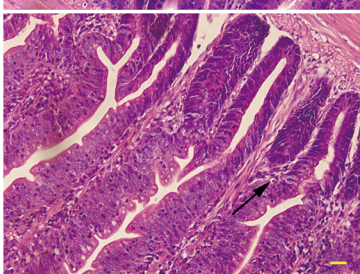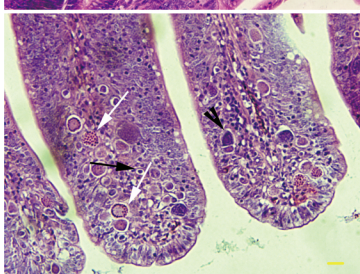

104h

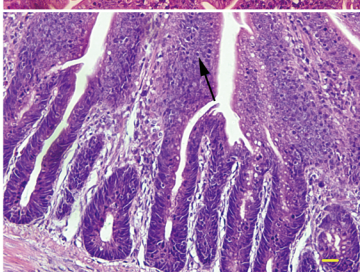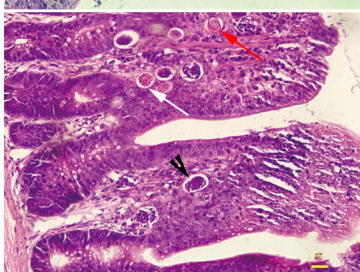



**BJ-WT-130****BJ-PL-98**

112h

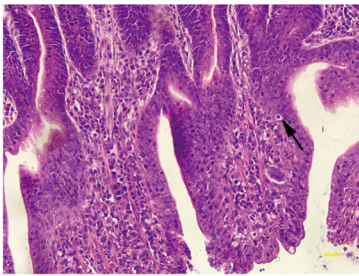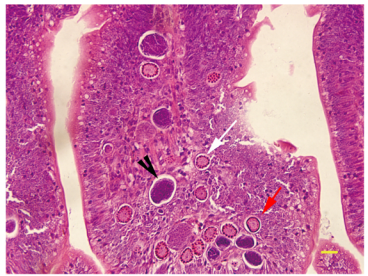

120h

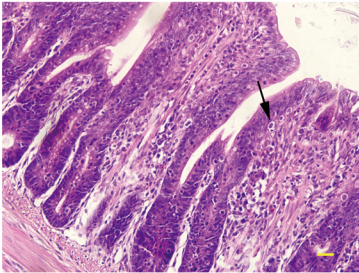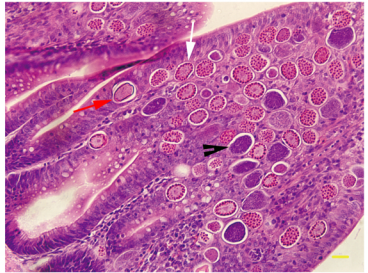

128h

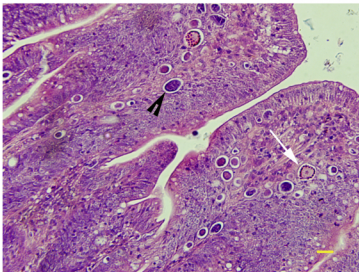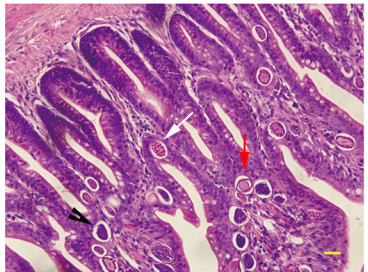

140h

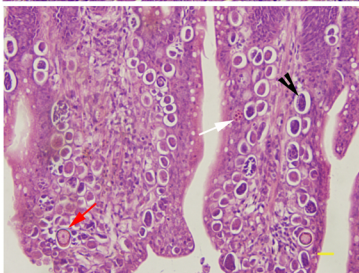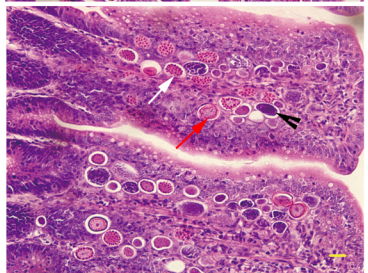

150h

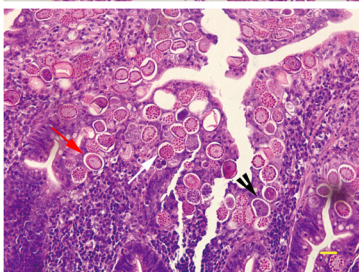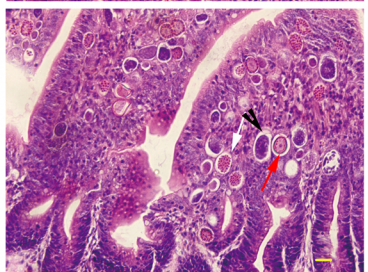

Supplement: 12864_2018_5090_MOESM3_ESM.pdf [file 12864_2018_5090_MOESM3_ESM.pdf]
