# Supplementary material for: Comparative transcriptome analysis of Eimeria maxima (Apicomplexa: Eimeriidae) suggests DNA replication activities correlating with its fecundity
Source: PubMed Central journal article supplement (PMC6154952; doi:10.1186/s12864-018-5090-2), 2018-09-24

# Cluster analysis of differentially expressed genes

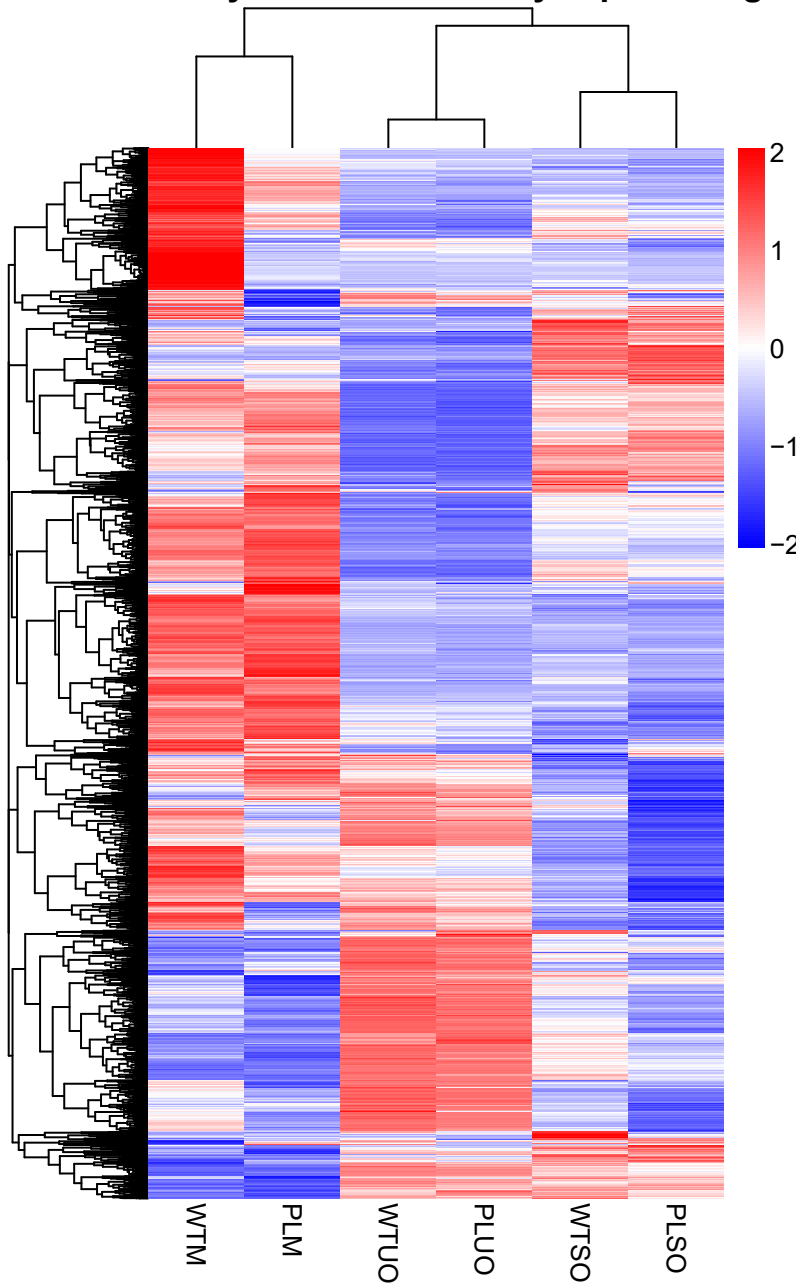

Supplement: 12864_2018_5090_MOESM5_ESM.pdf [file 12864_2018_5090_MOESM5_ESM.pdf]
